# Supplementary material
Source: PubMed Central journal article supplement (PMC7526689)
Supplement: NIHMS1599053-supplement-Supplemental_Material.pdf [file NIHMS1599053-supplement-Supplemental_Material.pdf]

## SUPPLEMENTAL MATERIALS

**Title: Scavenger receptor BI, not LDL receptor, mediates adrenal stress response**

**Authors:** Misa Ito, MD<sup>1,2</sup>, Xiang Ye, PhD<sup>1</sup>, Qian Wang<sup>1</sup>, Ling Guo, MD<sup>1</sup>, Dan Hao<sup>1,2</sup>, Deborah A. Howatt<sup>1</sup>, Lei Cai, PhD<sup>1</sup>, Ryan Temel, PhD<sup>1,3</sup>, Alan Daugherty, PhD, DSc<sup>1,2,3</sup> and Xiang-An Li, PhD<sup>1,2,3,\*</sup>

**Affiliations:** <sup>1</sup>Saha Cardiovascular Research Center, <sup>2</sup>Department of Pharmacology and Nutritional Sciences, <sup>3</sup>Department of Physiology, University of Kentucky College of Medicine, Lexington, KY 40536

Running title: HDL/SR-BI mediates adrenal stress response

\*Corresponding author: Xiang-An Li, PhD, Saha Cardiovascular Center, University of Kentucky College of Medicine, BBSRB B255, 741 S Limestone, Lexington, KY 40536. Tel: 859-257-5113.

Email: [xli2@email.uky.edu](mailto:xli2@email.uky.edu)

## Major Resources Table

In order to allow validation and replication of experiments, all essential research materials listed in the Methods should be included in the Major Resources Table below. Authors are encouraged to use public repositories for protocols, data, code, and other materials and provide persistent identifiers and/or links to repositories when available. Authors may add or delete rows as needed.

### Animals (in vivo studies)

| Species                                       | Vendor or Source       | Background Strain | Sex             | Persistent ID / URL                                                                                                                         |
|-----------------------------------------------|------------------------|-------------------|-----------------|---------------------------------------------------------------------------------------------------------------------------------------------|
| SR-BI <sup>+/-</sup> (B6;129S-Scarb1tm1Kri/J) | The Jackson Laboratory | 129S2/SvPas       | Male and female | <a href="https://www.jax.org/strain/003379">https://www.jax.org/strain/003379</a><br>Stock No:003379  SR-BI KO                              |
| ApoB100                                       | Taconic Biosciences    | C57BL/6NTac       | Male and female | <a href="https://www.taconic.com/transgenic-mouse-model/apob100">https://www.taconic.com/transgenic-mouse-model/apob100</a><br>Model # 1004 |
|                                               |                        |                   |                 |                                                                                                                                             |

### Genetically Modified Animals

| SR-BI <sup>-/-</sup> | Species                                       | Vendor or Source       | Background Strain | Other Information | Persistent ID / URL                                                                                            |
|----------------------|-----------------------------------------------|------------------------|-------------------|-------------------|----------------------------------------------------------------------------------------------------------------|
| Parent - Male        | SR-BI <sup>+/-</sup> (B6;129S-Scarb1tm1Kri/J) | The Jackson Laboratory | 129S2/SvPas       |                   | <a href="https://www.jax.org/strain/003379">https://www.jax.org/strain/003379</a><br>Stock No:003379  SR-BI KO |
| Parent - Female      | SR-BI <sup>+/-</sup> (B6;129S-Scarb1tm1Kri/J) | The Jackson Laboratory | 129S2/SvPas       |                   | <a href="https://www.jax.org/strain/003379">https://www.jax.org/strain/003379</a><br>Stock No:003379  SR-BI KO |

| SRBI <sup>-/-</sup><br>ApoBtg | Species             | Vendor or Source       | Background Strain | Other Information | Persistent ID / URL                                                                                                                         |
|-------------------------------|---------------------|------------------------|-------------------|-------------------|---------------------------------------------------------------------------------------------------------------------------------------------|
| Parent - Male                 | SRBI <sup>-/-</sup> | The Jackson Laboratory | 129S2/SvPas       |                   | <a href="https://www.jax.org/strain/003379">https://www.jax.org/strain/003379</a>                                                           |
| Parent - Female               | ApoB100             | Taconic Biosciences    | C57BL/6NTac       |                   | <a href="https://www.taconic.com/transgenic-mouse-model/apob100">https://www.taconic.com/transgenic-mouse-model/apob100</a><br>Model # 1004 |

## Calculation of LDL AUC

### LDL\_ratio

```
# fraction numbers
x <- c(6:31)

# control FPLC
y1 <- c(1.3615, 1.5565, 1.218, 0.8905, 0.6445, 0.3585, 0.0645, 0.171, 0.984, 0.8025, 1.492, 3.9, 9.955, 15.414, 19.7)
# LDL high mice
y2 <- c(0.3185, 0.612, 0.3895, 0.5325, 0.6225, 0.572, 1.948, 3.257, 6.176, 7.9435, 8.616, 8.0365, 8.9925, 10.9915, 13)

## Loading required package: xts
## Loading required package: zoo
##
## Attaching package: 'zoo'
## The following objects are masked from 'package:base':
##
##   as.Date, as.Date.numeric
## Registered S3 method overwritten by 'xts':
##   method      from
##   as.zoo.xts zoo
## Loading required package: TTR
## Registered S3 method overwritten by 'quantmod':
##   method      from
##   as.zoo.data.frame zoo
## Version 0.4-0 included new data defaults. See ?getSymbols.
## Loading required package: ALS
## Loading required package: nnlS
## Loading required package: Iso
## Iso 0.0-18
## Loading required package: ptw
##      rt      sd FWHM height      area
## [1,]  3 1.273983   3  1.2180  3.889562
## [2,] 10 7.219235  17  0.8025 14.521991
## [3,] 16 2.123305   5 18.8785 100.477703
##      rt      sd FWHM height      area
## [1,]  3 10.616523  25  0.3895  10.36525
## [2,]  6 10.616523  25  0.5720  15.22188
## [3,] 12  4.671270  11  8.0365  94.10048
## [4,] 17  3.821948   9 14.1130 135.20541
LDL_ratio <- fit2[3, 5]/fit1[2, 5]
HDL_ratio <- fit2[4, 5]/fit1[3, 5]

LDL_ratio
##      area
```

---

## Calculation of LDL AUC

```
# fraction numbers
x <- c(6:31)

# SRBI+/+ApoBwt
y1 <- c(0,0.206,0.251,0.096,0,0.206,0.206,0.008,0,0,0,0,0,0.008,0.273,0.538,1.178,2.304,1.928,0.825,0.5
# SRBI+/+ApoBtg
y2 <- c(0,0,0,0,0.21,0.33,0.21,0,0.067,0.833,2.269,3.179,2.581,1.862,1.168,0.833,1.36,2.485,2.126,0.857

# SRBI-/-ApoBwt
y3 <- c(1.473,1.553,1.315,0.788,0.735,0.498,0,0,0,0,0.419,2.502,9.173,15.606,20.432,18.823,15.606,11.09
# SRBI-/-ApoBtg
y4 <- c(0.366,1.263,0.946,1.078,1.052,1.157,2.027,2.634,5.534,7.986,9.357,8.223,8.434,9.519,12.68,13.89

## Loading required package: xts
## Loading required package: zoo
##
## Attaching package: 'zoo'
## The following objects are masked from 'package:base':
##
##   as.Date, as.Date.numeric
## Loading required package: TTR
## Registered S3 method overwritten by 'quantmod':
##   method      from
##   as.zoo.data.frame zoo
## Version 0.4-0 included new data defaults. See ?getSymbols.
## Loading required package: ALS
## Loading required package: nnlS
## Loading required package: Iso
## Iso 0.0-18
## Loading required package: ptw
##      rt      sd FWHM height  area
## [1,] NA      NA  NA      NA      NA
## [2,] 19 0.8493218  2  1.928 4.104585
##      rt      sd FWHM height  area
## [1,] 13 0.8493218  2  2.581 5.494779
## [2,] 19 0.8493218  2  2.126 4.526114
fit3
##      rt      sd FWHM height  area
```

---

# Suppl Fig. 1

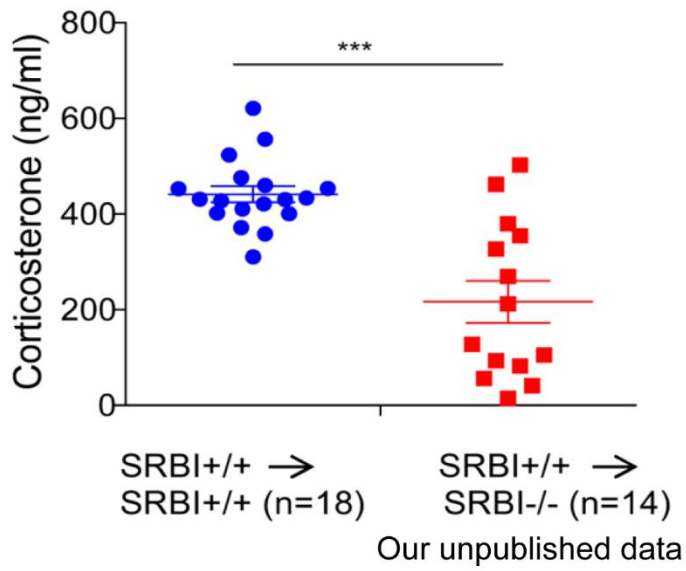

Suppl Fig 1. Adult recipient SRBI+/+ or SR-BI-/- mice were bilaterally adrenalectomized and adrenal gland from 9-day old SRBI+/+ mice was transplanted to the recipient mice. 6 weeks later, the mice were treated with cecal ligation and puncture (CLP) and the plasma corticosterone concentrations were quantified 4h post CLP.
